# Supplementary material
Source: MDPI journal article supplement (https://www.mdpi.com/2077-1312/11/1/11)
Supplement: s1 [file s1]

## Supplementary Materials

**Table S1.** Protocol use C18 SPE

| PHASE          | solvent                               | flow     | action    |
|----------------|---------------------------------------|----------|-----------|
| conditioning   | 6 ml MeOH<br>6 ml H <sub>2</sub> O mQ | 5 ml/min | discharge |
| Load & collect | 1 ml of crude extract                 | 3 ml/min | collect   |
| elute          | 2 ml H <sub>2</sub> O MQ              | 5 ml/min | collect   |

**Table S2.** Protocol use COOH SPE

| PHASE          | solvent                                | flow     | action             | toxins                           |
|----------------|----------------------------------------|----------|--------------------|----------------------------------|
| conditioning   | 10 ml Ammonium Acetate solution 0,01 M | 3 ml/min | discharge          |                                  |
| Fraction1      |                                        |          |                    |                                  |
| Load & collect | 2 ml SPE C18 extract                   | 3 ml/min | collect            |                                  |
| elute          | 4 ml H <sub>2</sub> O MQ               | 5 ml/min | Collect_Fraction 1 | C1,2-C3,4                        |
| Fraction2      |                                        |          |                    |                                  |
| elute          | 4 ml NaCl 0,05 M                       | 5 ml/min | Collect_Fraction 2 | GTX1,3-GTX2,3-dcGTX2,3-GTX5-GTX6 |
| Fraction3      |                                        |          |                    |                                  |
| elute          | 5 ml NaCl 0,3 M                        | 5 ml/min | Collect_Fraction 3 | STX; NEO; dcNEO, dcSTX           |

**Table S3.** Instrument parameters used in the analytical method for LTs toxins with LC-MS/Ms under the multiple reaction monitoring

| Toxin         | ESI mode | Parent ion           | Precursor ion m/z | Product ion m/z | DP(v) | CE(v) |
|---------------|----------|----------------------|-------------------|-----------------|-------|-------|
| OA            | NEG      | [M-H] <sup>-</sup>   | 803.5             | 255.0           | -25   | -62   |
| OA            | NEG      | [M-H] <sup>-</sup>   | 803.5             | 113.0           | -25   | -98   |
| DTX-2         | NEG      | [M-H] <sup>-</sup>   | 803.4             | 255.0           | -25   | -62   |
| DTX-2         | NEG      | [M-H] <sup>-</sup>   | 803.4             | 113.0           | -25   | -98   |
| DTX-1         | NEG      | [M-H] <sup>-</sup>   | 817.5             | 255.0           | -90   | -62   |
| DTX-1         | NEG      | [M-H] <sup>-</sup>   | 817.5             | 113.0           | -90   | -100  |
| YTX           | NEG      | [M-2H] <sup>2-</sup> | 570.4             | 467.2           | -106  | -42   |
| YTX           | NEG      | [M-2H] <sup>2-</sup> | 570.4             | 396.1           | -106  | -44   |
| 45 OH-YTX     | NEG      | [M-2H] <sup>2-</sup> | 578.4             | 467.4           | -106  | -42   |
| 45 OH-YTX     | NEG      | [M-2H] <sup>2-</sup> | 578.4             | 396.4           | -106  | -44   |
| HomoYTX       | NEG      | [M-2H] <sup>2-</sup> | 577.5             | 474.2           | -118  | -44   |
| HomoYTX       | NEG      | [M-2H] <sup>2-</sup> | 577.5             | 403.2           | -118  | -45   |
| 45 OH-HomoYTX | NEG      | [M-2H] <sup>2-</sup> | 578.4             | 474.4           | -106  | -42   |
| 45 OH-HomoYTX | NEG      | [M-2H] <sup>2-</sup> | 578.4             | 403.4           | -106  | -44   |
| AZA-1         | POS      | [M+H] <sup>+</sup>   | 842.5             | 824.5           | 114   | 43    |

|       |     |                    |       |       |     |    |
|-------|-----|--------------------|-------|-------|-----|----|
| AZA-1 | POS | [M+H] <sup>+</sup> | 842.5 | 806.5 | 114 | 56 |
| AZA-2 | POS | [M+H] <sup>+</sup> | 856.5 | 838.5 | 110 | 44 |
| AZA-2 | POS | [M+H] <sup>+</sup> | 856.5 | 820.5 | 110 | 56 |
| AZA-3 | POS | [M+H] <sup>+</sup> | 828.5 | 810.5 | 62  | 43 |
| AZA-3 | POS | [M+H] <sup>+</sup> | 828.5 | 792.5 | 62  | 56 |

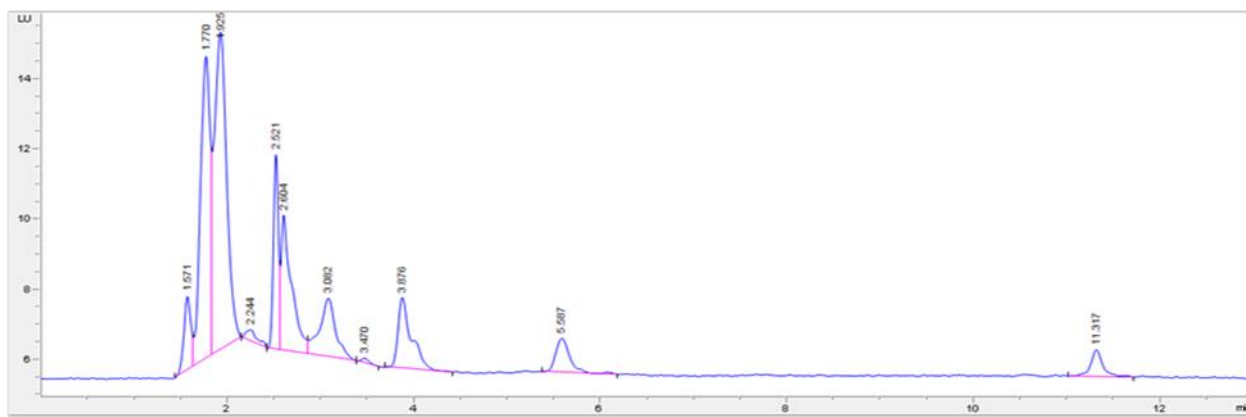

**Figure S1.** Chromatographic profile of the sample without oxidation for naturally fluorescence coextractives.

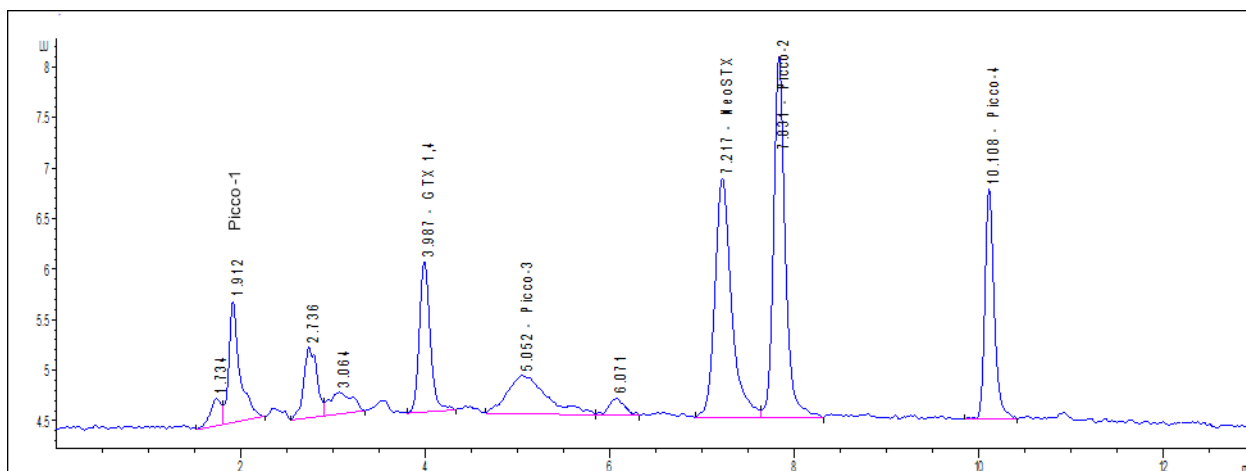

**Figure S2.** MIX I GTX1,4 and secondary oxidation products (peaks 1 and 2) NEO and secondary products (peaks 3 and 4) Oxidated with periodate.

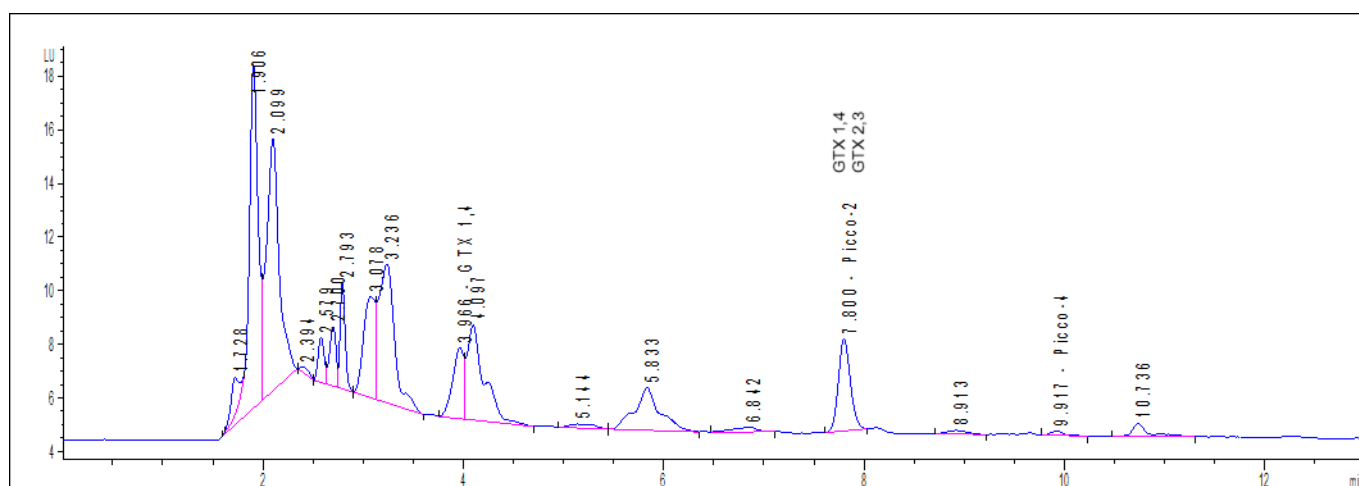

**Figure S3.** Sample after C18 Purification-Oxidated with periodate.

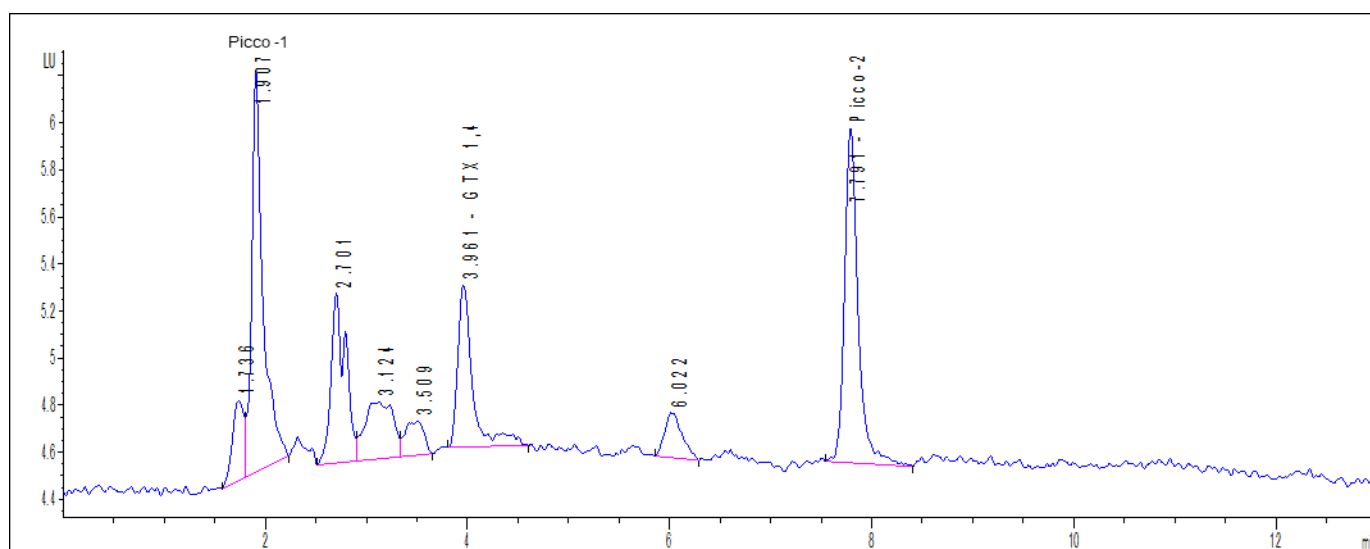

**Figure S4.** Sample after C18 and COOH Purification-Fraction 2-Oxidated with periodate.

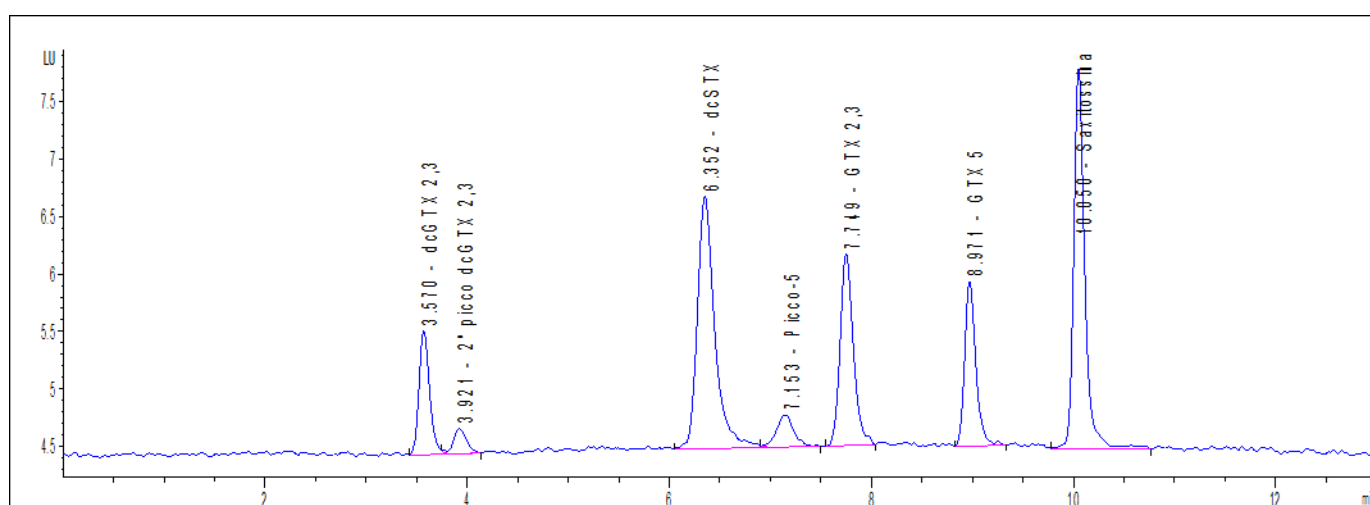

**Figure S5.** MIXII dcGTX2,3 and secondary product peak; dcSTX and secondary product peak 5; GTX2,3; GTX5; STX aNEO -Oxidated with peroxide.

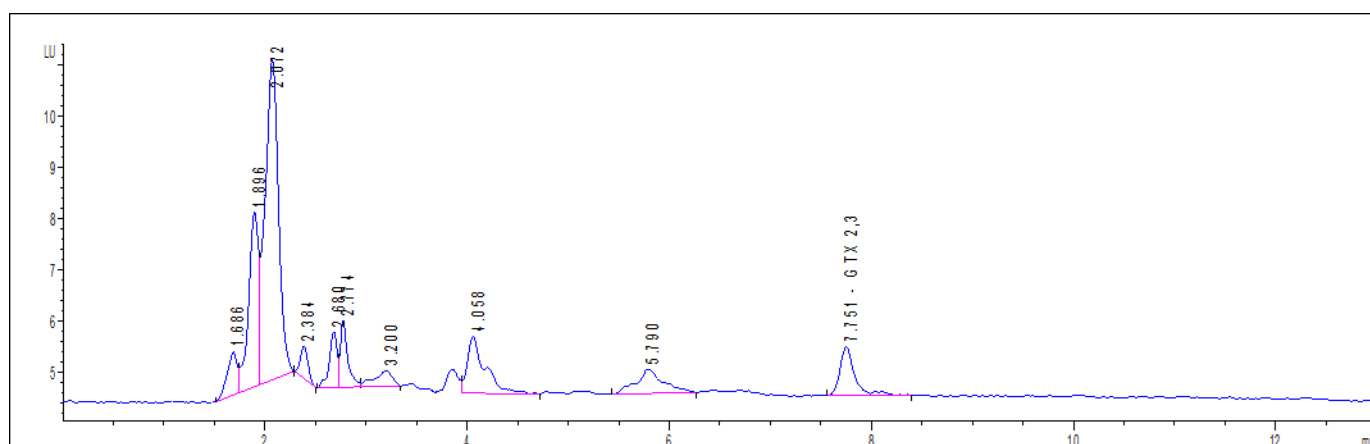

**Figure S6.** Sample after C18 Purification-Oxidated with peroxide.

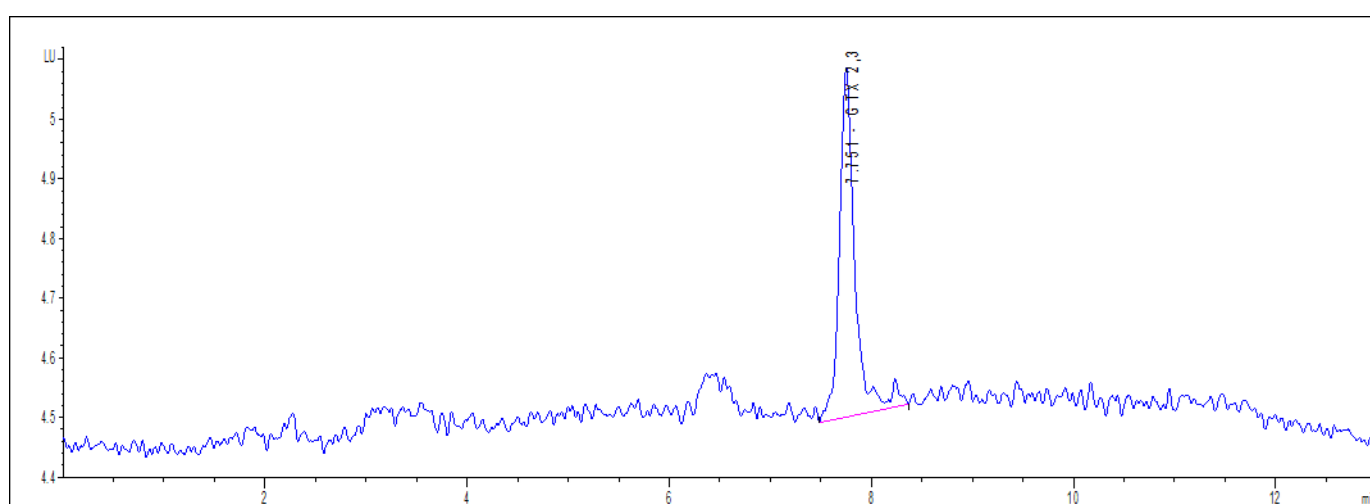

**Figure S7.** Sample after C18 and COOH Purification-Fraction 2-Oxidated with peroxide
